# Supplementary material
Source: ML conference proceedings conference paper supplement (https://openaccess.thecvf.com/content/CVPR2025/html/Yang_Tra-MoE_Learning_Trajectory_CVPR_2025_paper.html)
Supplement: Supplementary file 1 [file Yang_Tra-MoE_Learning_Trajectory_CVPR_2025_supplemental.zip]

# Tra-MoE: Learning Trajectory Prediction Model from Multiple Domains for Adaptive Policy Conditioning Supplementary Material

Jiange Yang<sup>1,2</sup> Haoyi Zhu<sup>2,3</sup> Yating Wang<sup>2,4</sup> Gangshan Wu<sup>1</sup> Tong He<sup>2</sup> Limin Wang<sup>1,2\*</sup>

<sup>1</sup>State Key Laboratory for Novel Software Technology, Nanjing University, China

<sup>2</sup>Shanghai AI Laboratory, <sup>3</sup>University of Science and Technology of China, <sup>4</sup>Tongji University

jianggeyang.jgy@gmail.com, {gswu, lmwang}@nju.edu.cn,

{zhuhaoyi, wangyating, hetong}@pjlab.org.cn

<https://github.com/MCG-NJU/Tra-MoE>

## A. Appendix

### A.1. Limitations and Discussion

In our work, we firstly demonstrate the effectiveness of using sparsely-gated Mixture-of-Experts (MoE) for learning trajectory prediction model from large-scale out-of-domain data, while conducting a thorough experimental study of its training techniques. To the best of our knowledge, this is one of the first attempts of using sparse MoE architecture for learning from multiple domains data to ensure better parameter cooperation and specialization in robotics. We hope it can serve as a strong baseline and facilitate further research in this direction. While we are encouraged by the strong results across a wide range of simulated and real-world experiments, some limitations and future works still remain. On the one hand, the trajectory prediction model learning can further integrate larger-scale human and robot video data. On the other hand, our adaptive policy condition technique can also be extended to other visual prompts.

### A.2. The stability of LIBERO experiment results

In our LIBERO simulation experiment results, the training process and results are completely reproducible. Due to the slight randomness in the simulation rendering, the downstream LIBERO evaluation results cannot be fully reproduced. Therefore, we further run the key experiments three times and report the mean and standard deviation in Tab. 1. The results indicate that the improvements brought by our Tra-MoE and adaptive policy conditioning technique are **significant and stable**.

### A.3. The comparison of trajectory prediction model

In our work, we find that CoTracker [1] can provide highly accurate labels. On the one hand, we can directly use the ground truth provided by CoTracker to calculate the MSE

error with our prediction results to measure the performance of trajectory prediction. On the other hand, considering that trajectory prediction task is multi-modal, we also need directly visualize some samples for prediction performance analysis. *In our experiments, we measure trajectory prediction performance using the MSE loss on validation set of four evaluation suites, as well as qualitatively and quantitatively find that the success rate of downstream manipulation tasks is generally positively correlated with the performance of the trajectory model, as shown in Fig. 1. Therefore, we report the average success rate of downstream manipulation tasks as our metric.*

We also fairly compare the Tra-baseline (the track transformer of ATM) and our Tra-MoE, which are both trained with a mixture of LIBERO and RLbench video data. Their respective MSE error on the LIBERO validation set are **0.0000034773** and **0.0000012449**. Additionally, we further randomly select some samples for visualization, as shown in Fig. 2. The visualization results also indicate that Tra-MoE is significantly more accurate than Tra-baseline. Tra-MoE is generally able to predict accurate trajectories, whereas Tra-baseline occasionally predict stationary or even opposite-direction movements, leading to poorer downstream policy. This is primarily attributed to optimization conflicts arising from multiple domains data joint training. Conversely, our Tra-MoE, with its superior parameter cooperation and specialization, can better handle such situations.

### A.4. The Simulation environments details

In this section, we further elaborate on the details of our simulation experiments. The training hyperparameters for the trajectory prediction model and the trajectory-guided policy are shown in Tab. 2 and Tab. 3, respectively. We use the same training hyperparameters to ensure a fair comparison between our Tra-MoE and Tra-baseline. When we train the trajectory model integrating RLbench data, we report the

---

\*Corresponding author.

|                        | Spatial | Goal | Object | Long | Avg. |                 |
|------------------------|---------|------|--------|------|------|-----------------|
| Tra-baseline           | 49.5    | 67.0 | 56.5   | 35.0 | 52.0 |                 |
|                        | 51.5    | 69.0 | 58.5   | 29.0 | 52.0 | <b>52.0±0.1</b> |
|                        | 51.5    | 67.0 | 58.5   | 31.5 | 52.1 |                 |
| Tra-MoE                | 62.5    | 81.0 | 73.5   | 28.5 | 61.4 |                 |
|                        | 62.5    | 80.5 | 72.5   | 27.5 | 60.8 | <b>61.2±0.4</b> |
|                        | 67.0    | 79.5 | 72.5   | 27.0 | 61.5 |                 |
| Tra-MoE + Aaptive Mask | 72.5    | 74.0 | 86.5   | 34.5 | 66.8 |                 |
|                        | 73.0    | 78.0 | 86.5   | 35.5 | 68.3 | <b>67.7±0.8</b> |
|                        | 72.5    | 75.5 | 87.5   | 36.0 | 67.9 |                 |

Table 1. We rerun the key experiments three times and report the mean and standard deviation.

| Hyperparameters  | In-domain data | Out-of-domain data       |
|------------------|----------------|--------------------------|
| Number of videos | 400            | 2200 / 2660              |
| Number of tasks  | 40             | 130 / 222                |
| Epoch            | 1000           | 300                      |
| Batch size       |                | 2048                     |
| Optimizer        |                | AdamW                    |
| Learning rate    |                | 1e-4                     |
| Weight decay     |                | 1e-4                     |
| LR scheduler     |                | Cosine                   |
| LR warm-up       |                | 5                        |
| Clip grad        |                | 10                       |
| Point sampling   |                | Variance filtering       |
| Number of points |                | 32                       |
| Track length     |                | 16                       |
| Augmentation     |                | ColorJitter, RandomShift |
| dropout          |                | 0.2                      |
| depth            |                | 8                        |
| dimension        |                | 384                      |

Table 2. Hyperparameters of our trajectory model training.

specific tasks used in Tab. 4. For the majority of the hyperparameters, we inherit the settings from ATM [3]. Additionally, when we extend Tra-baseline in depth, the depth is increased from 8 to 14; when we extend Tra-baseline in width, the dimension is increased from 384 to 512. Finally, following the original LIBERO [2] setup, we perform 20 trials for each task evaluation, ensuring a total of 800 (20×40) trials for each model evaluation.

### A.5. The Real-World environments details

In this section, we further elaborate on the details of our real-world experiments. Specifically, we use two leader arms to perform teleoperation for follower arms data collection, where 50 demonstrations are collected for each task for trajectory model and policy training. For our real-world evaluations, we conduct 20 trials for each task, while ensuring, to the extent possible, that the object poses in the training set differ from those in the test set. For the relevant

training hyperparameters, we maintain consistency with the simulation experiments.

## References

- [1] Nikita Karaev, Ignacio Rocco, Benjamin Graham, Natalia Neverova, Andrea Vedaldi, and Christian Rupprecht. Co-tracker: It is better to track together. *arXiv preprint arXiv:2307.07635*, 2023. 1, 4
- [2] Bo Liu, Yifeng Zhu, Chongkai Gao, Yihao Feng, Qiang Liu, Yuke Zhu, and Peter Stone. Libero: Benchmarking knowledge transfer for lifelong robot learning. *Advances in Neural Information Processing Systems*, 36, 2024. 2
- [3] Chuan Wen, Xingyu Lin, John So, Kai Chen, Qi Dou, Yang Gao, and Pieter Abbeel. Any-point trajectory modeling for policy learning. *arXiv preprint arXiv:2401.00025*, 2023. 2

| Hyperparameters          | Policy                  |
|--------------------------|-------------------------|
| Number of demonstrations | 100                     |
| epoch                    | 120                     |
| batch size               | 384                     |
| optimizer                | AdamW                   |
| learning rate            | 5e-4                    |
| weight decay             | 1e-4                    |
| lr scheduler             | Cosine                  |
| lr warm up               | 0                       |
| clip grad                | 100                     |
| point sampling           | grid                    |
| number of points         | 32                      |
| track length             | 16                      |
| frame stack              | 10                      |
| augmentation             | ColorJitter,RandomShift |
| dropout                  | 0.1                     |

Table 3. Hyperparameters of our trajectory-guided policy training.

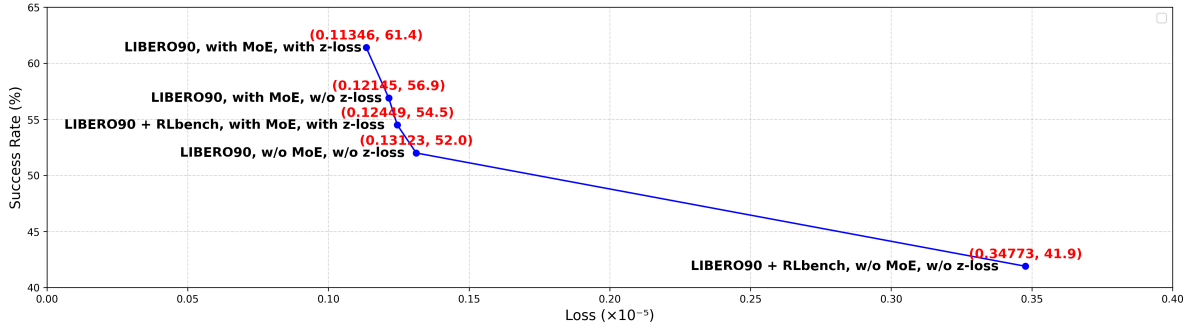

Figure 1. The quantitative relationship between downstream policy success rate and trajectory model performance.

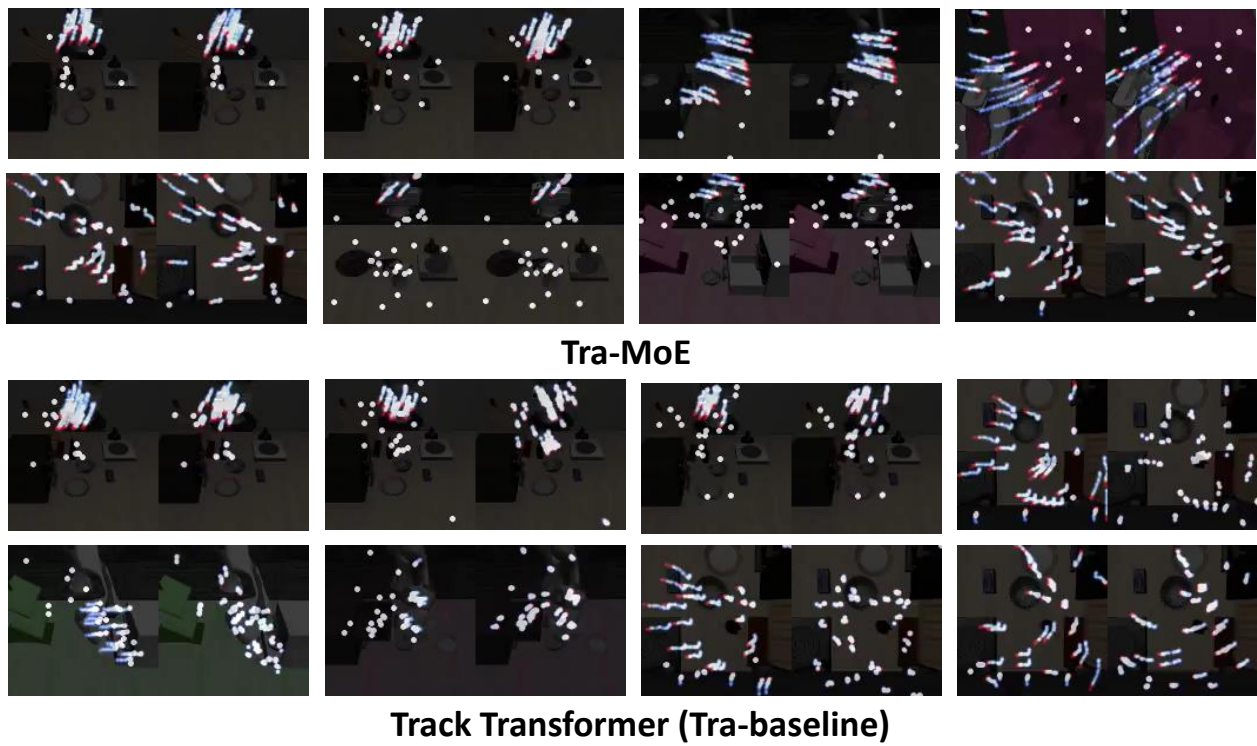

Figure 2. The trajectory prediction results visualization. **Left:** the ground truth by CoTracker [1]. **Right:** the prediction result.

|                                        |                                     |
|----------------------------------------|-------------------------------------|
| beat the buzz                          | lamp off                            |
| block pyramid                          | place hanger on rack                |
| put umbrella in umbrella stand         | take money out safe                 |
| place shape in shape sorter            | take umbrella out of umbrella stand |
| reach and drag                         | take tray out of oven               |
| lamp on                                | push button                         |
| change channel                         | take toilet roll off stand          |
| light bulb in                          | setup checkers                      |
| play jenga                             | close door                          |
| reach target                           | open door                           |
| take plate off colored dish rack       | meat on grill                       |
| change clock                           | close drawer                        |
| light bulb out                         | stack cups                          |
| plug charger in power supply           | take usb out of computer            |
| remove cups                            | slide cabinet open and place cups   |
| take shoes out of box                  | slide block to target               |
| close box                              | put bottle in fridge                |
| meat off grill                         | toilet seat down                    |
| pour from cup to cup                   | put groceries in cupboard           |
| scoop with spatula                     | toilet seat up                      |
| press switch                           | put item in drawer                  |
| screw nail                             | stack blocks                        |
| move hanger                            | close grill                         |
| close fridge                           | open microwave                      |
| open box                               | put books on bookshelf              |
| setup chess                            | put knife in knife block            |
| close jar                              | empty container                     |
| open drawer                            | turn tap                            |
| close laptop lid                       | open grill                          |
| open fridge                            | close microwave                     |
| solve puzzle                           | turn oven on                        |
| tv on                                  | wipe desk                           |
| put knife on chopping board            | hockey                              |
| stack wine                             | take cup out from cabinet           |
| unplug charger                         | put rubbish in bin                  |
| get ice from fridge                    | open wine bottle                    |
| open oven                              | hit ball with queue                 |
| put money in safe                      | weighing scales                     |
| straighten rope                        | sweep to dustpan                    |
| water plants                           | put plate in colored dish rack      |
| hang frame on hanger                   | open window                         |
| phone on base                          | put tray in oven                    |
| put shoes in box                       | place cups                          |
| take frame off hanger                  | insert usb in computer              |
| insert onto square peg                 | take item out of drawer             |
| pick and lift put toilet roll on stand | take lid off saucepan               |

Table 4. The language annotations of 92 RLbench tasks.
